# Supplementary material for: Living with and beyond cancer with comorbid illness: a qualitative systematic review and evidence synthesis
Source: Springer Nature journal article supplement (doi:10.1007/s11764-019-0734-z), 2019-01-26
Supplement: MOESM2 [file 16422632]

Living with and beyond cancer with comorbid illness: a qualitative systematic review and evidence synthesis, Journal of Cancer Survivorship, Debbie Cavers, Liset Habets, Sarah Cunningham-Burley, Eila Watson, Elspeth Banks, Christine Campbell

Corresponding author: Debbie Cavers, University of Edinburgh, Scotland, UK, [Debbie.Cavers@ed.ac.uk](mailto:Debbie.Cavers@ed.ac.uk)

## Online Resource 2: Inclusion and exclusion criteria

### Inclusion criteria:

- Study population – Adults (over 18) with a diagnosis of cancer and at least one other condition (as specified in appendix 1), carers and health professionals
- Articles relating to experience of illness from patient, carer and professional perspectives
- Articles focusing on areas denoted in the dimensions of interest
- Studies with a qualitative empirical design
- Articles published in English

### Exclusion criteria:

- Articles not meeting the above inclusion criterion.
- Articles published before 2000
- Articles focusing on long term side effects of cancer treatment or second primary cancers alone.
