# Supplementary material for: Living with and beyond cancer with comorbid illness: a qualitative systematic review and evidence synthesis
Source: Springer Nature journal article supplement (doi:10.1007/s11764-019-0734-z), 2019-01-26
Supplement: MOESM4 [file 16422632]

**Online Resource 4: Critical appraisal of included studies using the Critical Appraisal Skills Programme (CASP) tool**

| Author      | Year | Total score (max 10) | 1. Clear statement of the aims? | 2. Is qualitative methodology appropriate? | 3. Research design appropriate?                  | 4. Recruitment strategy appropriate? | 5. Data collection that addressed research issue? | 6. Relationship between researcher and participants? | 7. Ethical issues considered? | 8. Data analysis sufficient?      | 9. Clear statement of findings?            | 10. How valuable is the research? |
|-------------|------|----------------------|---------------------------------|--------------------------------------------|--------------------------------------------------|--------------------------------------|---------------------------------------------------|------------------------------------------------------|-------------------------------|-----------------------------------|--------------------------------------------|-----------------------------------|
| 1. Baker    | 2015 | 10                   | Y                               | Y                                          | Y                                                | Y                                    | Y, no 5 or 7                                      | Y, no 2                                              | Y, no 2                       | Y                                 | Y                                          | Y                                 |
| 2. Bartlett | 2012 | 5.5/6                | Y                               | Y                                          | Y                                                | N                                    | Y, no 1, 5 or 7                                   | N                                                    | N                             | N                                 | Y, no 3 or 4                               | Y                                 |
| 3. Beck     | 2009 | 9                    | Y                               | Y                                          | Y, no 1 (don't justify a mixed methods approach) | Y, no detail on 1, no 2 or 3         | Y, no 3 or 7, 5 n/a                               | N, no 1 or 2                                         | Y, no 2                       | Y, no 5 or 6                      | Y, no 3                                    | Y                                 |
| 4. Clarke   | 2014 | 9                    | Y                               | Y                                          | Y                                                | Y                                    | Y                                                 | Y                                                    | Y                             | Y                                 | Y                                          | N, not very clear                 |
| 5. Corner   | 2013 | 9                    | Y                               | Y                                          | Y                                                | Y, no 3                              | Y, no 5 or 7                                      | N, no 1 or 2                                         | Y, no 2                       | Y, no 5 or 6                      | Y, no 2                                    | Y                                 |
| 6. Courtier | 2015 | 9                    | Y                               | Y                                          | Y                                                | Y, no 2                              | Y, no 4 or 7                                      | N                                                    | Y                             | Y, no 5 or 6                      | Y, no 3 and more detail on 2 would be good | Y                                 |
| 7. Dahlhaus | 2014 | 9                    | Y                               | Y                                          | Y                                                | Y                                    | Y, no 5                                           | N, no 1 or 2                                         | Y                             | Y, no 3 or 6                      | Y                                          | Y, more detail on 2 needed        |
| 8. Fenlon   | 2012 | 9                    | Y                               | Y                                          | Y                                                | Y                                    | Y                                                 | N, no 1 or 2                                         | Y                             | Y                                 | Y                                          | Y                                 |
| 9. Fix      | 2014 | 9                    | Y                               | Y                                          | Y                                                | Y, no detail on 2                    | Y, no 4, 5 or 6                                   | N                                                    | Y, little detail on 2         | Y, no 5 or 6. I am not sure about | Y                                          | Y                                 |

|              |      |     |                       |   |                                                                            |                                                                        |              |              |                   |                                                                                               |            |         |
|--------------|------|-----|-----------------------|---|----------------------------------------------------------------------------|------------------------------------------------------------------------|--------------|--------------|-------------------|-----------------------------------------------------------------------------------------------|------------|---------|
|              |      |     |                       |   |                                                                            |                                                                        |              |              |                   | a grounded theory approach when they are using a particular framework 'the Explanatory Model' |            |         |
| 10.Hannum    | 2015 | 9   | Y                     | Y | Y                                                                          | Y, no 1                                                                | Y, no 5 or 7 | N, no 1 or 2 | Y                 | Y, no 5 or 6                                                                                  | Y          | Y       |
| 11.Hershey   | 2012 | 8   | Y                     | Y | Y                                                                          | Y                                                                      | Y, no 5 or 7 | N            | Y, no 2           | Y, more 4 needed, no 6                                                                        | Y, no 3    | Y       |
| 12.Kantsiper | 2009 | 8.5 | Y, a little bit vague | Y | Y, some sensitive personal issues may have been missed from patient groups | Y, potential missing voices as recruitment was through support groups. | Y            | N            | Y, limited report | Y, large volume of data so could have presented more                                          | Y          | Y       |
| 13.Loerzel   | 2012 | 9   | Y                     | Y | Y                                                                          | Y                                                                      | Y            | N            | Y                 | Y                                                                                             | Y          | Y       |
| 14.Loerzel   | 2013 | 9   | Y                     | Y | Y                                                                          | Y, no 3                                                                | Y            | N            | Y, no 3           | Y, no 6                                                                                       | Y          | Y       |
| 15.Mason     | 2014 |     | Y, no 1               | Y | Y                                                                          | Y, no 2 or 3                                                           | Y, no 3 or 7 | N            | Y, no 2           | Y, no 5 or 6                                                                                  | Y          | Y       |
| 16.Morgan    | 2015 | 7.5 | Y                     | Y | Y                                                                          | Y                                                                      | Y            | N            | Y                 | N                                                                                             | Y, limited | Y       |
| 17.Nanton    | 2016 | 9.5 | Y                     | Y | Y                                                                          | Y                                                                      | Y            | Y            | Y                 | Y                                                                                             | Y          | Y       |
| 18.Norman    | 2001 | 7   | Y                     | Y | N, Unsure about content analysis with a grounded theory approach           | N, convenience sample in one location                                  | Y            | N            | Y                 | Y                                                                                             | Y          | Y       |
| 19.Palmer    | 2011 | 7.5 | Y                     | Y | Y                                                                          | Y, no 2 or 3                                                           | Y, no 3 or 7 | N            | Y, no 2           | Y, no 3 or 6                                                                                  | Y          | Y, no 3 |

|                   |      |     |                                |   |   |                       |              |                                                             |                                                               |                             |         |         |
|-------------------|------|-----|--------------------------------|---|---|-----------------------|--------------|-------------------------------------------------------------|---------------------------------------------------------------|-----------------------------|---------|---------|
| 20.Palmer         | 2013 | 7.5 | Y                              | Y | N | Y, no 2 or 3          | Y, no 3 or 7 | N                                                           | Y, no 2                                                       | Y, no 3 or 6                | Y       | Y, no 3 |
| 21.Sada           | 2017 | 8   | Y                              | Y | Y | Y, no 3               | Y            | N                                                           | Y, not enough on 2                                            | Can't tell, no 1, 2, 5 or 6 | Y       | Y       |
| 22.Saunders Sturm | 2003 | 10  | Y                              | Y | Y | Y                     | Y            | Y                                                           | Y                                                             | Y                           | Y       | Y       |
| 23.Sawin          | 2012 | 8   | Y, no explicit 1 in main paper | Y | Y | Y, no 3               | Y, no 3 or 7 | N                                                           | N, not enough given the highly sensitive nature of the topic. | Y, no 6                     | Y       | Y       |
| 24.Sinding        | 2008 | 10  | Y                              | Y | Y | Y                     | Y            | Y                                                           | Y                                                             | Y                           | Y       | Y       |
| 25.Sowerbutts     | 2015 | 8   | Y                              | y | Y | Y, no 2 or 3          | Y            | N                                                           | Y, no 2                                                       | Y, no 6                     | Y       | Y       |
| 26.Thome'         | 2013 | 9   | Y                              | Y | Y | Y, no 2               | Y            | N                                                           | Y                                                             | Y, no 6                     | Y       | Y       |
| 27.Volker         | 2013 | 8   | Y                              | Y | Y | Y, no 2 and limited 3 | Y, no 6      | N                                                           | Y, no 3 evident?                                              | Y, no 6                     | Y, no 3 | Y       |
| 28.Wallace        | 2015 | 9   | Y                              | Y | Y | Y                     | Y, no 5 or 7 | Y, not explicitly discussing role and impact                | Y                                                             | Y                           | Y       | Y       |
| 29.Wimberley      | 2012 | 9.5 | Y                              | Y | Y | Y                     | Y, no 7      | Y                                                           | Y                                                             | Y                           | Y       | Y       |
| 30.Yoo            | 2010 | 6.5 | Y                              | Y | Y | Not clear             | Y, no 5 or 7 | N                                                           | N                                                             | Y                           | Y       | Y       |
| 31.Zhang          | 2015 | 8   | Y                              | Y | Y | Y                     | Y, no 7      | Mention of race of researcher but not why it is significant | N                                                             | Y, no 5 or 6                | Y       | Y       |
